# Supplementary material for: Oxidative addition of carbon dioxide into mesoionics
Source: Royal Society of Chemistry journal article supplement (doi:10.1039/c8cp07321j), 2019-01-01
Supplement: c8cp07321j1.pdf [file c8cp07321j1.pdf]

## **Oxidative addition of carbon dioxide into mesoionics**

Simon Mathieu and Georges Trinquier

Laboratoire de Chimie et Physique Quantiques, IRSAMC-CNRS-UMR5626,  
Université Paul-Sabatier (Toulouse III), 31062 Toulouse Cedex 4, France

**Supplementary information**

Table S1. Optimized geometrical parameters. <sup>a</sup>

| system                                                           | label     | sym.     | formula                                                                       | $d_{C-C}$ | $d_{C-O}$ | $\alpha_{OCO}$ | $\omega_{CCCCO}$ | $\mu$ |
|------------------------------------------------------------------|-----------|----------|-------------------------------------------------------------------------------|-----------|-----------|----------------|------------------|-------|
| <i>pyriliium family</i>                                          |           |          |                                                                               |           |           |                |                  |       |
| <i>ortho</i>                                                     | <b>34</b> | $C_1$    | C <sub>5</sub> H <sub>4</sub> O-CO <sub>2</sub>                               | 1.527     | 1.236     | 136.0          | 68.9             | 10.0  |
| <i>meta</i>                                                      | <b>35</b> | $C_s$    | C <sub>5</sub> H <sub>4</sub> O-CO <sub>2</sub>                               | 1.572     | 1.238     | 134.9          | 0.0              | 11.5  |
| <i>para</i>                                                      | <b>1</b>  | $C_2$    | C <sub>5</sub> H <sub>4</sub> O-CO <sub>2</sub>                               | 1.517     | 1.238     | 134.2          | 60.0             | 9.4   |
| <i>o</i> -diamino <i>ortho</i>                                   | <b>36</b> | $C_2$    | C <sub>5</sub> H <sub>6</sub> ON <sub>2</sub> -CO <sub>2</sub>                | 1.556     | 1.249     | 128.8          | 13.7             | 9.1   |
| <i>pyridinium family</i>                                         |           |          |                                                                               |           |           |                |                  |       |
| <i>ortho</i>                                                     | <b>37</b> | $C_s$    | C <sub>5</sub> H <sub>5</sub> N-CO <sub>2</sub>                               | 1.566     | 1.240     | 134.8          | 0.0              | 10.3  |
| <i>meta</i>                                                      | <b>38</b> | $C_s$    | C <sub>5</sub> H <sub>5</sub> N-CO <sub>2</sub>                               | 1.570     | 1.240     | 134.4          | 0.0              | 13.2  |
| <i>para</i>                                                      | <b>2</b>  | $C_{2v}$ | C <sub>5</sub> H <sub>5</sub> N-CO <sub>2</sub>                               | 1.569     | 1.241     | 134.3          | 0.0              | 14.0  |
| <i>N</i> -amino <i>ortho</i>                                     | <b>4</b>  | $C_1$    | C <sub>5</sub> H <sub>6</sub> N <sub>2</sub> -CO <sub>2</sub>                 | 1.584     | 1.240     | 132.2          | 1.6              | 9.7   |
| <i>N</i> -amino <i>meta</i>                                      | <b>39</b> | $C_s$    | C <sub>5</sub> H <sub>6</sub> N <sub>2</sub> -CO <sub>2</sub>                 | 1.572     | 1.240     | 134.3          | 0.0              | 12.3  |
| <i>N</i> -amino <i>para</i>                                      | <b>40</b> | $C_s$    | C <sub>5</sub> H <sub>6</sub> N <sub>2</sub> -CO <sub>2</sub>                 | 1.568     | 1.240     | 134.3          | 0.0              | 14.4  |
| <i>N</i> -methyl <i>ortho</i> (homarine)                         | <b>41</b> | $C_1$    | C <sub>6</sub> H <sub>7</sub> N-CO <sub>2</sub>                               | 1.575     | 1.237     | 133.8          | 38.8             | 10.1  |
| <i>N</i> -methyl <i>meta</i> (trigonelline)                      | <b>3</b>  | $C_s$    | C <sub>6</sub> H <sub>7</sub> N-CO <sub>2</sub>                               | 1.570     | 1.240     | 134.2          | 0.0              | 13.8  |
| <i>N</i> -methyl <i>para</i>                                     | <b>42</b> | $C_s$    | C <sub>6</sub> H <sub>7</sub> N-CO <sub>2</sub>                               | 1.567     | 1.241     | 134.2          | 0.0              | 15.0  |
| ectoine                                                          | <b>43</b> | $C_1$    | C <sub>5</sub> H <sub>10</sub> N <sub>2</sub> -CO <sub>2</sub>                | 1.594     | 1.244     | 132.6          | 11.3             | 12.4  |
| iso-ectoine ( <i>para</i> )                                      | <b>44</b> | $C_s$    | C <sub>5</sub> H <sub>10</sub> N <sub>2</sub> -CO <sub>2</sub>                | 1.603     | 1.241     | 133.3          | 28.6             | 16.0  |
| <i>triazinium family</i>                                         |           |          |                                                                               |           |           |                |                  |       |
| (CO <sub>2</sub> ) <sub>1</sub>                                  | <b>5</b>  | $C_{2v}$ | C <sub>3</sub> H <sub>3</sub> N <sub>3</sub> -CO <sub>2</sub>                 | 1.582     | 1.232     | 138.3          | 0.0              | 6.2   |
| (CO <sub>2</sub> ) <sub>2</sub>                                  | <b>6</b>  | $C_{2v}$ | C <sub>3</sub> H <sub>3</sub> N <sub>3</sub> -(CO <sub>2</sub> ) <sub>2</sub> | 1.603     | 1.227     | 140.2          | 0.0              | 5.3   |
| (CO <sub>2</sub> ) <sub>1</sub> <i>p</i> - <i>N</i> -amino       | <b>8</b>  | $C_s$    | C <sub>3</sub> H <sub>4</sub> N <sub>4</sub> -CO <sub>2</sub>                 | 1.575     | 1.233     | 138.1          | 0.6              | 7.3   |
| (CO <sub>2</sub> ) <sub>1</sub> <i>o</i> - <i>N,N</i> -diamino   | <b>9</b>  | $C_2$    | C <sub>3</sub> H <sub>5</sub> N <sub>5</sub> -CO <sub>2</sub>                 | 1.583     | 1.234     | 134.2          | 38.8             | 5.5   |
| (CO <sub>2</sub> ) <sub>1</sub> <i>o,p</i> - <i>N,N</i> -diamino | <b>10</b> | $C_1$    | C <sub>3</sub> H <sub>5</sub> N <sub>5</sub> -CO <sub>2</sub>                 | 1.586     | 1.235     | 135.5          | 5.8              | 6.7   |
| (CO <sub>2</sub> ) <sub>2</sub> <i>o</i> - <i>N,N</i> -diamino   | <b>45</b> | $C_1$    | C <sub>3</sub> H <sub>4</sub> N <sub>5</sub> -(CO <sub>2</sub> ) <sub>2</sub> | 1.594     | 1.231     | 135.6          | 4.7              | 4.7   |
| (CO <sub>2</sub> ) <sub>1</sub> <i>N,N,N</i> -triamino           | <b>11</b> | $C_1$    | C <sub>3</sub> H <sub>6</sub> N <sub>6</sub> -CO <sub>2</sub>                 | 1.585     | 1.235     | 133.7          | 35.1             | 6.4   |
| (CO <sub>2</sub> ) <sub>2</sub> <i>N,N,N</i> -triamino           | <b>12</b> | $C_s$    | C <sub>3</sub> H <sub>6</sub> N <sub>6</sub> -(CO <sub>2</sub> ) <sub>2</sub> | 1.597     | 1.232     | 134.2          | 32.6             | 5.9   |
| (CO <sub>2</sub> ) <sub>3</sub> <i>N,N,N</i> -triamino           | <b>13</b> | $C_s$    | C <sub>3</sub> H <sub>6</sub> N <sub>6</sub> -(CO <sub>2</sub> ) <sub>3</sub> | 1.615     | 1.232     | 133.0          | 24.6             | 0.5   |
| <i>tropylium family</i>                                          |           |          |                                                                               |           |           |                |                  |       |
| tropylium                                                        | <b>16</b> | $C_2$    | C <sub>7</sub> H <sub>6</sub> -CO <sub>2</sub>                                | 1.564     | 1.239     | 134.3          | 32.7             | 11.1  |
| <i>o</i> -diamino tropylium                                      | <b>17</b> | $C_2$    | C <sub>7</sub> H <sub>8</sub> N <sub>2</sub> -CO <sub>2</sub>                 | 1.571     | 1.254     | 124.8          | 8.5              | 9.0   |
| <i>m</i> -diamino tropylium                                      | <b>18</b> | $C_{2v}$ | C <sub>7</sub> H <sub>8</sub> N <sub>2</sub> -CO <sub>2</sub>                 | 1.599     | 1.241     | 132.8          | 0.0              | 14.1  |
| tetraamino tropylium                                             | <b>19</b> | $C_s$    | C <sub>9</sub> H <sub>10</sub> N <sub>4</sub> -CO <sub>2</sub>                | 1.554     | 1.256     | 126.0          | 0.0              | 9.3   |
| tetraamino <i>N,N</i> -dimethyl tropylium                        | <b>46</b> | $C_s$    | C <sub>11</sub> H <sub>14</sub> N <sub>4</sub> -CO <sub>2</sub>               | 1.557     | 1.243     | 131.8          | 90.0             | 8.5   |
| hexaamino tropylium                                              | <b>20</b> | $C_s$    | C <sub>10</sub> H <sub>12</sub> N <sub>6</sub> -CO <sub>2</sub>               | 1.550     | 1.257     | 125.9          | 0.0              | 11.4  |
| azulene ammonium                                                 | <b>21</b> | $C_1$    | C <sub>10</sub> H <sub>9</sub> N-CO <sub>2</sub>                              | 1.580     | 1.243     | 132.2          | 15.3             | 26.2  |
| azulene ammonium tetraamino                                      | <b>22</b> | $C_s$    | C <sub>12</sub> H <sub>13</sub> N <sub>5</sub> -CO <sub>2</sub>               | 1.566     | 1.255     | 125.7          | 1.3              | 22.4  |
| <i>phenalene family</i>                                          |           |          |                                                                               |           |           |                |                  |       |
| P1 major                                                         | <b>14</b> | $C_1$    | C <sub>13</sub> H <sub>8</sub> -CO <sub>2</sub>                               | 1.510     | 1.241     | 132.9          | 70.1             | 10.6  |
| P1 minor                                                         | <b>15</b> | $C_2$    | C <sub>13</sub> H <sub>8</sub> -CO <sub>2</sub>                               | 1.561     | 1.242     | 133.8          | 17.2             | 14.3  |
| P3 major                                                         | <b>53</b> | $C_1$    | C <sub>31</sub> H <sub>14</sub> -CO <sub>2</sub>                              | 1.525     | 1.243     | 131.4          | 54.8             | 16.7  |
| P3 minor                                                         | <b>54</b> | $C_1$    | C <sub>31</sub> H <sub>14</sub> -CO <sub>2</sub>                              | 1.555     | 1.244     | 132.4          | 9.4              | 20.6  |

| <i>sydnone family</i>                          |           |          |                         |       |       |       |      |      |
|------------------------------------------------|-----------|----------|-------------------------|-------|-------|-------|------|------|
| sydnone                                        | <b>23</b> | $C_s$    | $C_2H_2N_2O-CO_2$       | 1.637 | 1.222 | 139.8 | 0.0  | 11.2 |
| <i>N</i> -phenyl sydnone                       | <b>24</b> | $C_1$    | $C_8H_6N_2O-CO_2$       | 1.610 | 1.227 | 138.5 | 0.0  | 14.3 |
| <i>C</i> -phenyl sydnone                       | <b>26</b> | $C_1$    | $C_8H_6N_2O-CO_2$       | 1.575 | 1.230 | 136.6 | 58.2 | 10.8 |
| <i>C</i> -amino sydnone                        | <b>27</b> | $C_1$    | $C_2H_3N_3O-CO_2$       | 1.566 | 1.238 | 135.7 | 0.0  | 11.0 |
| <i>C</i> -amino <i>N</i> -phenyl sydnone       | <b>28</b> | $C_1$    | $C_8H_7N_3O-CO_2$       | 1.562 | 1.238 | 135.1 | 0.0  | 13.4 |
| sydnone (alternative isomer)                   | <b>29</b> | $C_s$    | $C_2H_2N_2O-CO_2$       | 1.610 | 1.229 | 137.9 | 0.0  | 7.2  |
| <i>3,5,8-membered rings</i>                    |           |          |                         |       |       |       |      |      |
| cyclopropene diamino                           | <b>25</b> | $C_{2v}$ | $C_3H_4N_2-CO_2$        | 1.606 | 1.229 | 137.8 | 0.0  | 12.5 |
| cyclopentadiene <i>o</i> -diamino              | <b>47</b> | $C_{2v}$ | $C_5H_6N_2-CO_2$        | 1.499 | 1.258 | 129.8 | 0.0  | 10.0 |
| diazole                                        | <b>48</b> | $C_{2v}$ | $C_3H_4N_2-CO_2$        | 1.561 | 1.235 | 137.1 | 0.0  | 9.8  |
| diazole (unsymmetrical)                        | <b>49</b> | $C_s$    | $C_3H_4N_2-CO_2$        | 1.562 | 1.239 | 135.3 | 0.0  | 12.6 |
| diazole <i>o</i> -diamino                      | <b>50</b> | $C_2$    | $C_3H_6N_4-CO_2$        | 1.550 | 1.241 | 133.1 | 9.8  | 7.4  |
| COT allene diamino                             | <b>51</b> | $C_2$    | $C_8H_8N_2-CO_2$        | 1.630 | 1.238 | 132.8 | 17.6 | 12.9 |
| COT (CO <sub>2</sub> ) <sub>2</sub> tetraamino | <b>52</b> | $D_2$    | $C_8H_{10}N_4-(CO_2)_2$ | 1.593 | 1.242 | 130.7 | 38.3 | 0.0  |
| <i>linear polyene family</i>                   |           |          |                         |       |       |       |      |      |
| nona-tetraenyl                                 |           | $C_2$    | $C_9H_{10}-CO_2$        | 1.519 | 1.240 | 132.3 | 71.6 | 6.8  |
| undeca-pentaenyl                               |           | $C_2$    | $C_{11}H_{12}-CO_2$     | 1.593 | 1.236 | 134.2 | 46.0 | 8.3  |
| trideca-hexaenyl                               |           | $C_2$    | $C_{13}H_{14}-CO_2$     | 1.527 | 1.241 | 131.9 | 66.8 | 7.1  |
| pentadeca-heptaenyl                            |           | $C_2$    | $C_{15}H_{16}-CO_2$     | 1.584 | 1.239 | 133.4 | 43.8 | 8.8  |
| heptadeca-octaenyl                             |           | $C_2$    | $C_{17}H_{18}-CO_2$     | 1.532 | 1.242 | 131.8 | 64.2 | 7.2  |
| nonadeca-nonaenyl                              |           | $C_2$    | $C_{19}H_{20}-CO_2$     | 1.581 | 1.240 | 133.0 | 42.7 | 9.3  |
| uncosa-decaenyl                                |           | $C_2$    | $C_{21}H_{22}-CO_2$     | 1.534 | 1.242 | 131.6 | 62.6 | 7.3  |
| $\alpha,\omega$ -diamino allyl                 |           | $C_{2v}$ | $C_3H_6N_2-CO_2$        | 1.539 | 1.255 | 127.6 | 0.0  | 8.5  |
| $\alpha,\omega$ -diamino penta-dienyl          |           | $C_2$    | $C_5H_8N_2-CO_2$        | 1.587 | 1.243 | 130.8 | 36.4 | 9.1  |
| $\alpha,\omega$ -diamino hepta-trienyl         |           | $C_2$    | $C_7H_{10}N_2-CO_2$     | 1.580 | 1.245 | 130.0 | 18.4 | 10.4 |
| $\alpha,\omega$ -diamino nona-tetraenyl        |           | $C_2$    | $C_9H_{12}N_2-CO_2$     | 1.554 | 1.244 | 131.3 | 53.7 | 8.2  |
| $\alpha,\omega$ -diamino undeca-pentaenyl      |           | $C_2$    | $C_{11}H_{14}N_2-CO_2$  | 1.577 | 1.244 | 131.2 | 33.7 | 10.9 |
| $\alpha,\omega$ -diamino trideca-hexaenyl      |           | $C_2$    | $C_{13}H_{16}N_2-CO_2$  | 1.545 | 1.243 | 131.4 | 58.1 | 7.6  |
| $\alpha,\omega$ -diamino pentadeca-heptaenyl   |           | $C_2$    | $C_{15}H_{18}N_2-CO_2$  | 1.576 | 1.243 | 131.6 | 37.0 | 11.7 |
| $\alpha,\omega$ -diamino heptadeca-octaenyl    |           | $C_2$    | $C_{17}H_{20}N_2-CO_2$  | 1.543 | 1.243 | 131.4 | 58.7 | 7.4  |
| $\alpha,\omega$ -diamino nonadeca-nonaenyl     |           | $C_2$    | $C_{19}H_{22}N_2-CO_2$  | 1.576 | 1.243 | 131.8 | 38.2 | 12.0 |
| $\alpha,\omega$ -diamino uncosa-decaenyl       |           | $C_2$    | $C_{21}H_{24}N_2-CO_2$  | 1.542 | 1.243 | 131.4 | 58.6 | 7.2  |

<sup>a</sup> Distances in angströms, angles in degrees, dipole moments ( $\mu$ ) in Debyes; in systems carrying more than one CO<sub>2</sub>, average is taken for the geometrical parameters.

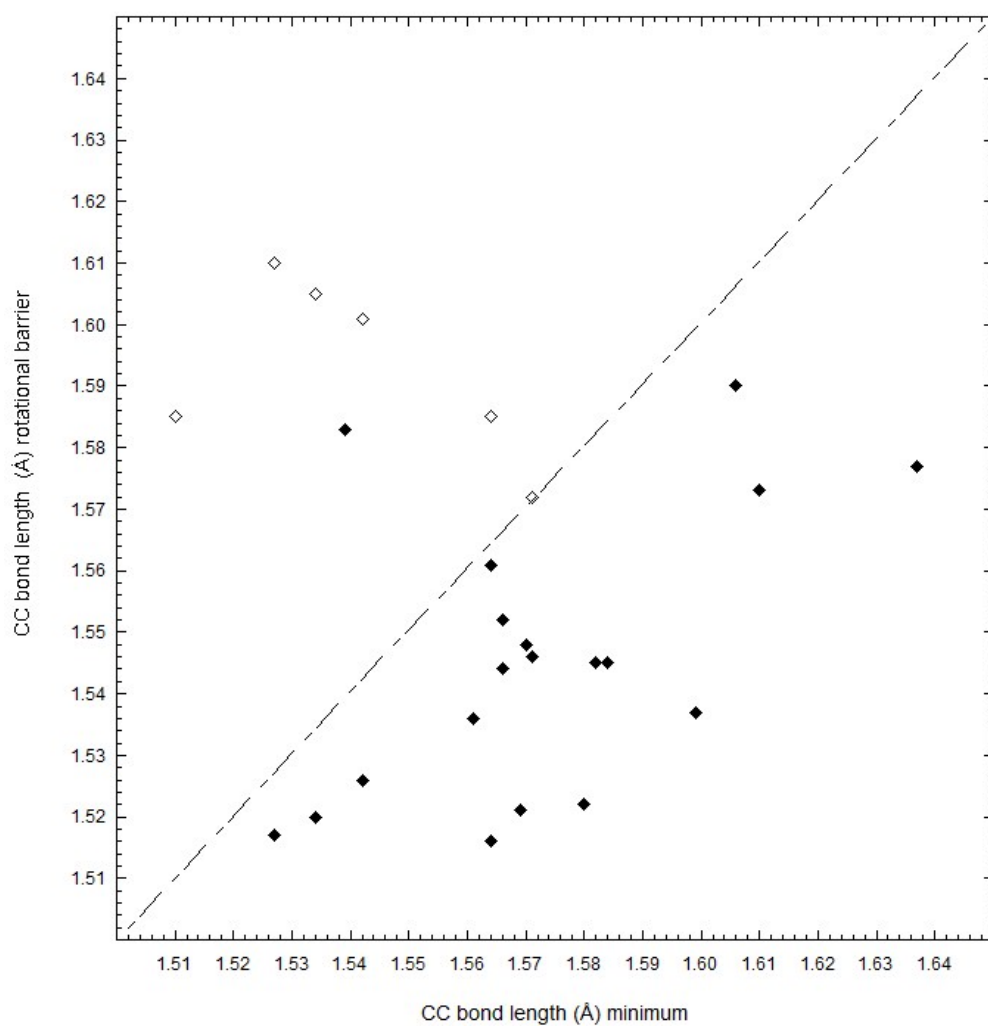

Figure S1. Visualization of C-C bond shortening when going from equilibrium minima to orthogonal rotational transition states. Empty dots refer to cases where minima are skewed and rotational barriers occur for planar arrangements. The upper-left orphan full dot corresponds to the diaminoallyl adduct.

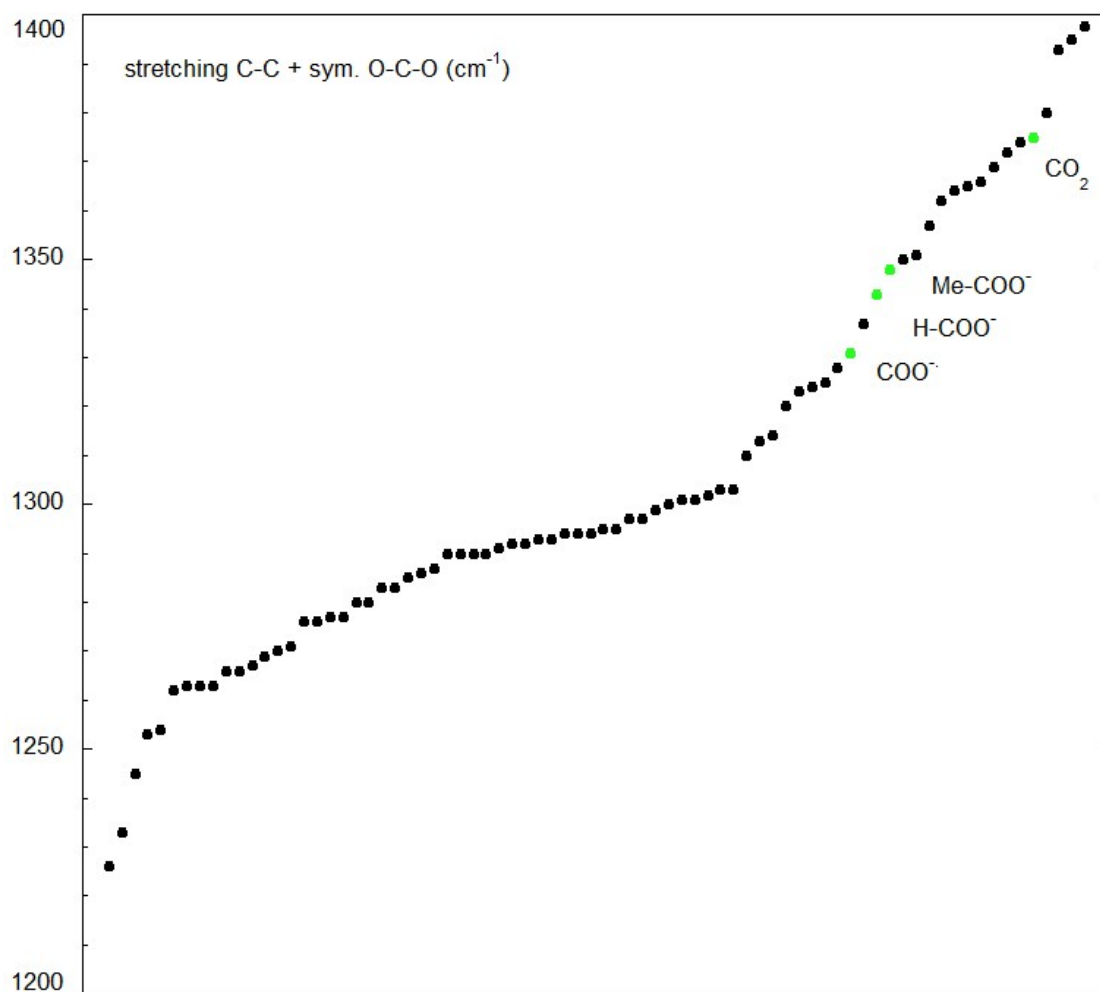

Figure S2. Range of calculated harmonic vibrational frequencies for the symmetric O-C-O stretching mode (with various mixing); green dots refer to simple parent carboxylates.

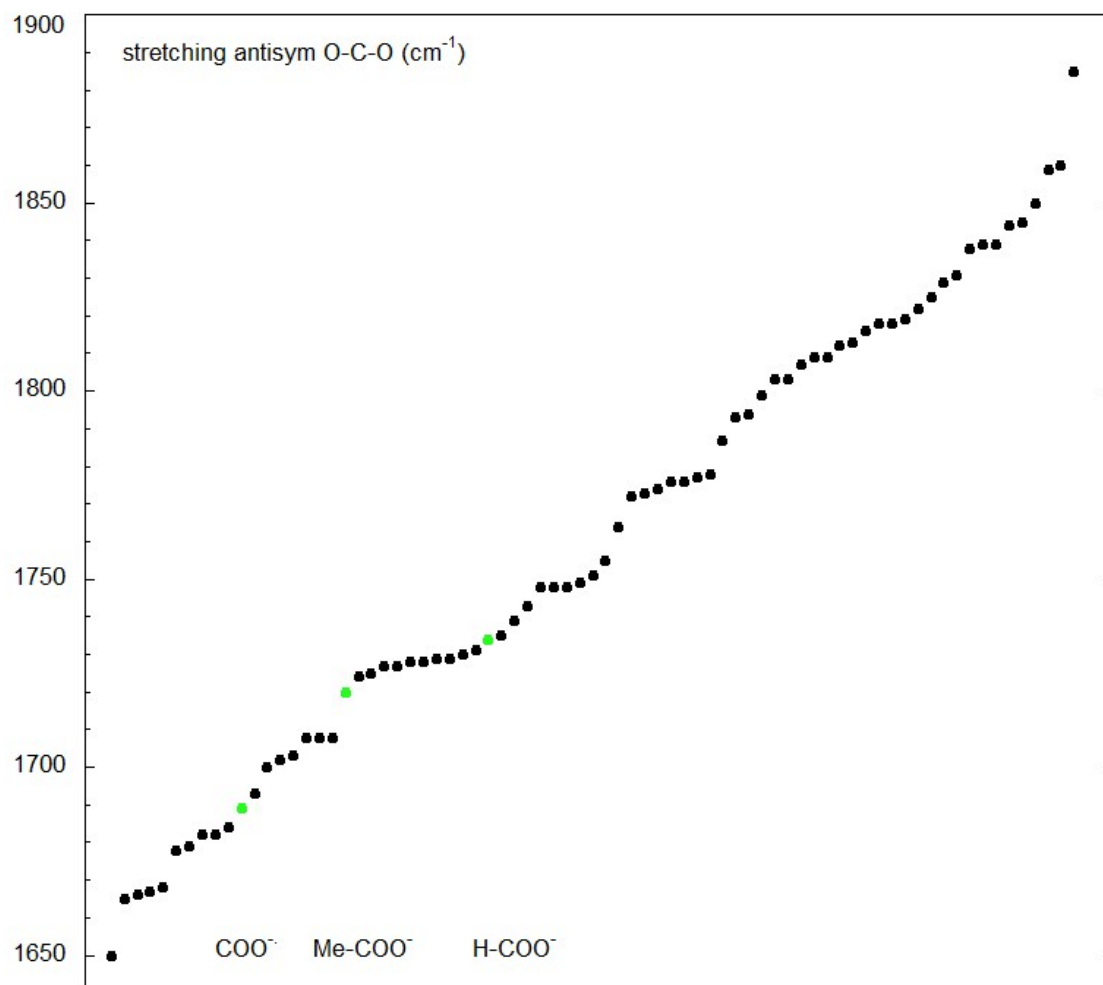

Figure S3. Range of calculated harmonic vibrational frequencies for the antisymmetric O-C-O stretching mode; green dots refer to simple parent carboxylates.
